# Supplementary material
Source: PubMed Central journal article supplement (PMC2871439)
Supplement: supp_M109.082115_jbc.M109.082115-1.pdf [file supp_M109.082115_jbc.M109.082115-1.pdf]

Supplementary Figure 1

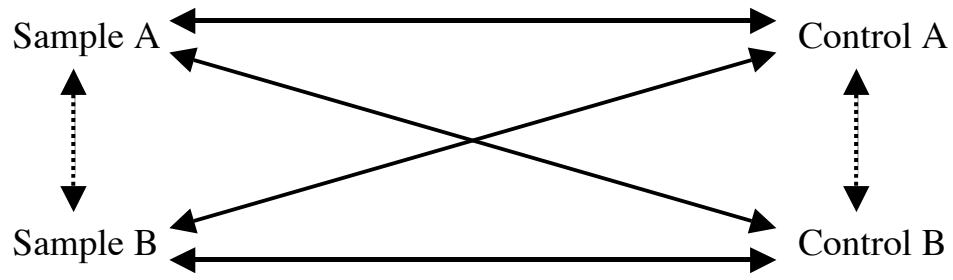



Supplementary Figure 3

**A**

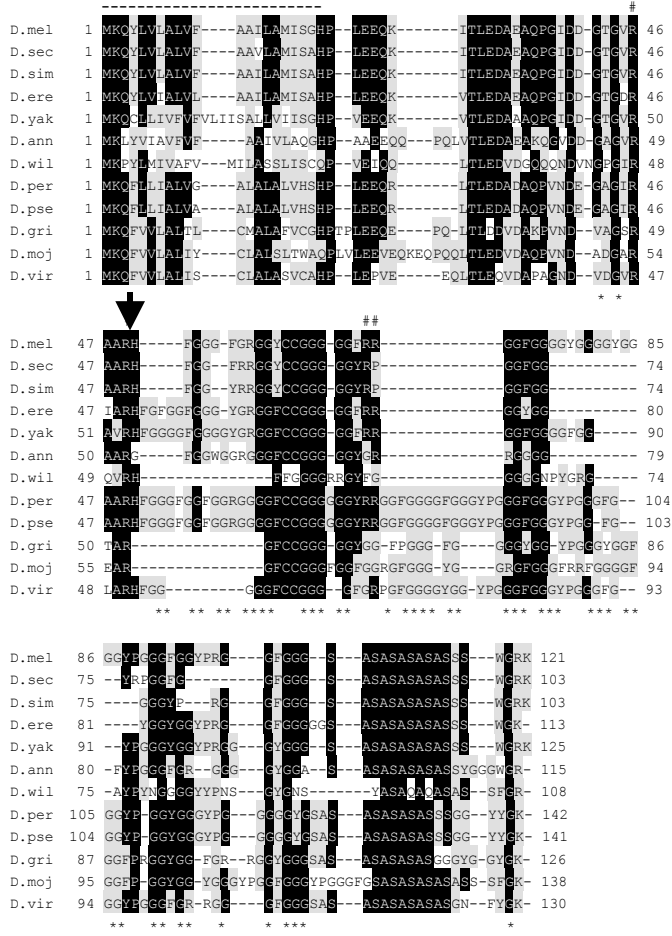

**B**

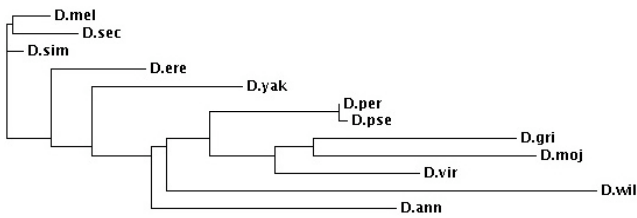

**Table 1. Primer list**

| <b>For checking overexpression</b> | <b>Forward primer<br/>5'- sequence -3'</b>              | <b>Reverse primer<br/>5'- sequence -3'</b>              |
|------------------------------------|---------------------------------------------------------|---------------------------------------------------------|
| <i>Upd</i>                         | CCTATCCGAACAGCAATGGTG                                   | TTCAGATACTGGAAGTACAGC                                   |
| <i>PGRP-LC</i>                     | ATAACCCCGCATTCAATGGTG                                   | TTCCGAAGAGATTGTGGTGG                                    |
| <i>Toll</i>                        | CGACCCGTGGTTCTGGGATAAG                                  | CATTCTGCGGTTGGCAATCA                                    |
| <b>For making dsRNA</b>            | <b>Forward primer<br/>5'- sequence -3'</b>              | <b>Reverse primer<br/>5'- sequence -3'</b>              |
| <i>dsGFP</i>                       | TAATACGACTCACTATAGGGAGACCAC<br>GGAGAAGAACTTCACTGGAG     | TAATACGACTCACTATAGGGAGACCAC<br>GTATAGTTCATCCATGCCATG    |
| <i>dsKey</i>                       | TAATACGACTCACTATAGGGAGACCAC<br>TTGGGTAGCTCGCCGTGCTCCTCG | TAATACGACTCACTATAGGGAGACCAC<br>CGTCTCTAGGTCCTCTTCAGCTC  |
| <i>dsDif</i>                       | TAATACGACTCACTATAGGGAGACCAC<br>GGAACGCAATTCGCTTCGCCTC   | TAATACGACTCACTATAGGGAGACCAC<br>ATTCCTCAAGCTATTGAGTTCTGC |
| <i>dsdorsal</i>                    | TAATACGACTCACTATAGGGAGACCAC<br>CCACCAGGATGGCAGTAAGT     | TAATACGACTCACTATAGGGAGACCAC<br>CATGGTGTCTGGGTGAGTG      |
| <i>dsStat92E</i>                   | TAATACGACTCACTATAGGGAGACCAC<br>CTTGCCCAAACTACAGTTAC     | TAATACGACTCACTATAGGGAGACCAC<br>CGACTGTGGGTGGATTGTT      |
| <b>For checking RNAi effect</b>    | <b>Forward primer<br/>5'- sequence -3'</b>              | <b>Reverse primer<br/>5'- sequence -3'</b>              |
| <i>Key</i>                         | CTCGTTTGAGTTCGTACCAGAG                                  | TTTCTCTCCGGCATTCTTCTC                                   |
| <i>Dif</i>                         | AGTATACGATATTTCCAAGC                                    | CTCTGGCTATCCACATCCATG                                   |
| <i>dorsal</i>                      | CTACGTAAAGGGGGTAATG                                     | CAAATATTCTTCGCATGTAACG                                  |
| <i>Stat92E</i>                     | TTACGCGCAATACACAGATGG                                   | CGTCCATCACGCTCTCAGTG                                    |
| <b>For real-time PCR</b>           | <b>Forward primer<br/>5'- sequence -3'</b>              | <b>Reverse primer<br/>5'- sequence -3'</b>              |
| <i>Listericin (CG9080)</i>         | TTGCGGCCATTCTGGCCATG                                    | TTTACGTCCCAACTGGAAC                                     |
| <i>Diptericin</i>                  | GTTACCATTGCCGTGCCTTAC                                   | CCCAAGTGCTGTCCATATCCTCC                                 |
| <i>Drosomycin</i>                  | TTGTTCGCCCTCTTCGCTGCCT                                  | GCATCCTTCGCACCAGCACTTCA                                 |
| <i>Vir-1</i>                       | CTCAACCGGAAGAGCAAAG                                     | TTCGCTCATCACACAGGAG                                     |
| <i>Rp49</i>                        | AGATCGTGAAGAAGCGCACCAAG                                 | CACCAGGAACCTTGAATCCGG                                   |
